# Supplementary material for: A novel transcription factor-like gene SbSDR1 acts as a molecular switch and confers salt and osmotic endurance to transgenic tobacco
Source: PubMed Central journal article supplement (PMC4994045; doi:10.1038/srep31686), 2016-08-23
Supplement: srep31686-s1.pdf [file srep31686-s1.pdf]

## Supplementary data

**A novel transcription factor-like gene *SbSDR1*  
acts as a molecular switch and  
confers salt and osmotic endurance to transgenic tobacco**

Vijay Kumar Singh, Avinash Mishra\*, Intesaful Haque and Bhavanath Jha\*

Division of Marine Biotechnology and Ecology, CSIR-Central Salt and Marine  
Chemicals Research Institute, G. B. Marg, Bhavnagar (Gujarat), India

\*Corresponding authors

Tel: +91-278-2567760 Ext. 6260; Fax: +91-278-2567562; e-mails:

[avinash@csmcri.org](mailto:avinash@csmcri.org) (AM) and [bjha@csmcri.org](mailto:bjha@csmcri.org) (BJ)

**Table S1: Primers used in the study and PCR conditions**

| Purpose                                                                                               | Primer        | Orientation | Sequence (5'-3')              | PCR conditions                                                                |
|-------------------------------------------------------------------------------------------------------|---------------|-------------|-------------------------------|-------------------------------------------------------------------------------|
| RACE                                                                                                  | GSP5'R1       | Reverse     | GCCTTTAGCCATACCCATCAA         | As suggested 5' RACE System for Rapid Amplification of cDNA Ends, version 2.0 |
|                                                                                                       | GSP5'R2       | Reverse     | CGGCTCTTTCTCCTTGTCTTTA        |                                                                               |
|                                                                                                       | GSP5'R3       | Reverse     | CCTTCAGCCTTGTTACATACTG        |                                                                               |
| Full length gene, Genomic organization, semi quantitative Rt PCR and confirmation of transgenic lines | SDR1-F        | Forward     | ATGGAAGGAGAAGCAGC             | [94°C-5min] x1; [94°C-30sec, 55°C-30sec, 72°C-30sec] x30; [72°C-10min] x1     |
|                                                                                                       | SDR1-R        | Reverse     | TCACTTATTAAAGAGGCCTT          |                                                                               |
| Transcript profiling                                                                                  | SDR1RT-F      | Forward     | CAAAAACAGAGCATGGAGCA          | [94°C-5min] x1; [94°C-10sec, 60°C-30sec] x40 followed by melt curve analysis  |
|                                                                                                       | SDR1RT-R      | Reverse     | CTGTTTTTCGTCGAGCTTTCC         |                                                                               |
| Cloning into pET28a expression vector                                                                 | SDR1pET-F     | Forward     | CCCAAGCTTATGGAAGGAGAAGCAGC    | [94°C-5min] x1; [94°C-30sec, 58°C-30sec, 72°C-30sec] x30; [72°C-10min] x1     |
|                                                                                                       | SDR1pET-R     | Reverse     | CCGCTCGAGTCACTTATTAAAGAGGCCTT |                                                                               |
| Probe for Southern hybridization (copy number)                                                        | SDR1RT-F      | Forward     | CAAAAACAGAGCATGGAGCA          | [94°C-5min] x1; [94°C-30sec, 55°C-30sec, 72°C-30sec] x30; [68°C-7min] x1      |
|                                                                                                       | SDR1RT-R      | Reverse     | CTGTTTTTCGTCGAGCTTTCC         |                                                                               |
| For expression of transcription factor and other genes                                                | NtAP2-F       | Forward     | AAGGGCGAGGAAGAACAAAT          | [94°C-5min] x1; [94°C-10sec, 60°C-30sec] x40 followed by melt curve analysis  |
|                                                                                                       | NtAP2-R       | Reverse     | GTGGCTCTGGAAAGTTGA            |                                                                               |
|                                                                                                       | NtPLC-F       | Forward     | CTGATGACGGAGCAGGTGT           |                                                                               |
|                                                                                                       | NtPLC-R       | Reverse     | CTGAGCAAGTTCCGCTGAG           |                                                                               |
|                                                                                                       | NtLEA5-F      | Forward     | CATCTCTGCTTTCGTGCTTG          |                                                                               |
|                                                                                                       | NtLEA5-R      | Reverse     | AGCATGACTCTCTGGCCTGT          |                                                                               |
|                                                                                                       | NtP5CS-F      | Forward     | CTCCCTGCTCAAGATTCCA           |                                                                               |
|                                                                                                       | NtP5CS-R      | Reverse     | ACAGCAGCACTGTCAACCTG          |                                                                               |
|                                                                                                       | NtERF8-F      | Forward     | TCCAAGCCCAAATCAACTTC          |                                                                               |
|                                                                                                       | NtERF8-R      | Reverse     | GGGCAATCGGATCTCAACTA          |                                                                               |
| Subcellular localization                                                                              | SDR1CA-F      | Forward     | CACCATGGAAGGAGAAGCAGC         | [94°C-5min] x1; [94°C-30sec, 55°C-30sec, 72°C-30sec] x35; [72°C-10min] x1     |
|                                                                                                       | SDR1CA-R      | Reverse     | TCACTTATTAAAGAGGCCTT          |                                                                               |
| Cloning in pRT101                                                                                     | SDR1pRT-F     | Forward     | TCCGAGCTCATGGAAGGAGAAGCAGC    | [94°C-5min] x1; [94°C-30sec, 58°C-30sec, 72°C-30sec] x30; [72°C-10min] x1     |
|                                                                                                       | SDR1pRT-R     | Reverse     | CGCGGATCCTCACTTATTAAAGAGGCCTT |                                                                               |
| Reference genes                                                                                       | Sbβ-tubline-F | Forward     | GGAGTCACCGAGGCAGAG            |                                                                               |
|                                                                                                       | Sbβ-tubline-R | Reverse     | ATCACATATCAGAAACCACAA         |                                                                               |
|                                                                                                       | uidA-F        | Forward     | GATCGCGAAAACGTGGAAT           |                                                                               |
|                                                                                                       | uidA-R        | Reverse     | TGAGCGTCGCAGCAGAACATTAC       |                                                                               |
|                                                                                                       | NtActin-F     | Forward     | CGTTTGGATCTTGCTGGTTCGT        |                                                                               |
|                                                                                                       | NtActin-R     | Reverse     | CAGCAATGCCAGGGAACATAG         |                                                                               |

### ***SbSDR1* gene (KF015229)**

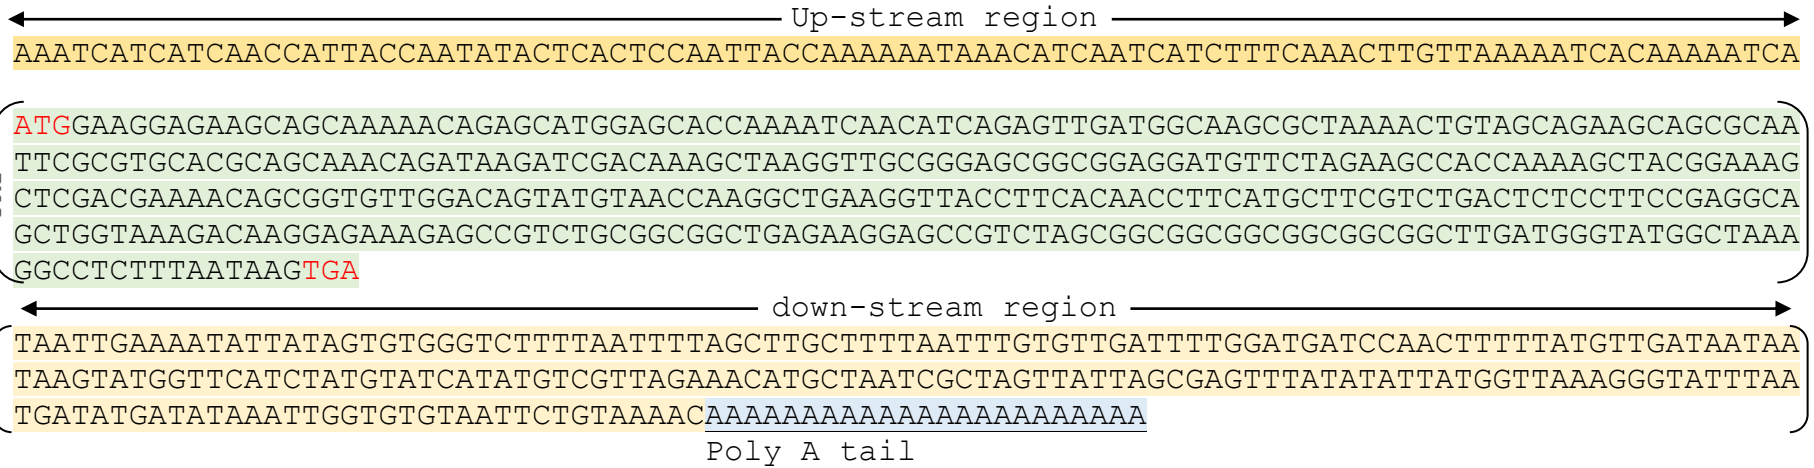

### ***SbSDR1* protein (AGU69247)**

MEGEAAKTEHGAPKSTSELMASAKTVAEAAQFACTQQTDKIDKAKVAGAAEDVLEATKSYGKLDENSGVGVVTKAEGYLHNLHASSDSPSEA  
AGKDKKEKESAAAEEKPSSGGGGGLMGMMAKGLFNK

**Figure S1:** Graphical representation of *SbSDR1* gene. The *SbSDR1* cDNA sequence was 728 bp long and consisted of a 5'-untranslated leader sequence (5'-UTR; 1–93 bp), an open reading frame (ORF; 94–483 bp), a 3'-UTR (483–705 bp) and a poly(A) tail of 23 base pairs. The 390-bp ORF encodes a peptide of 129 amino acids.

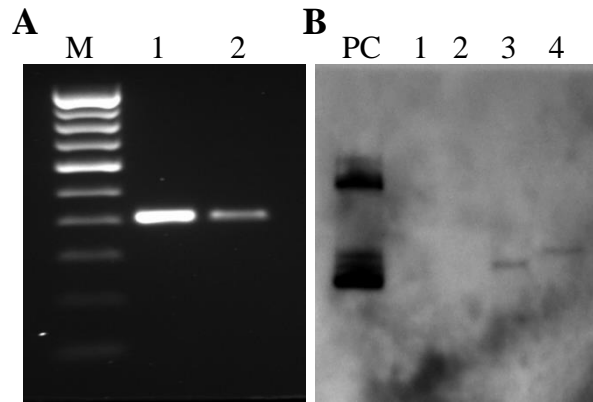

**Figure S2:** Genome organization. (A) PCR amplification of *SbSDR1* gene from genomic DNA and cDNA; and (B) Southern hybridisation of *S. brachiata* genome to determine copy number of *SbSDR1* gene.

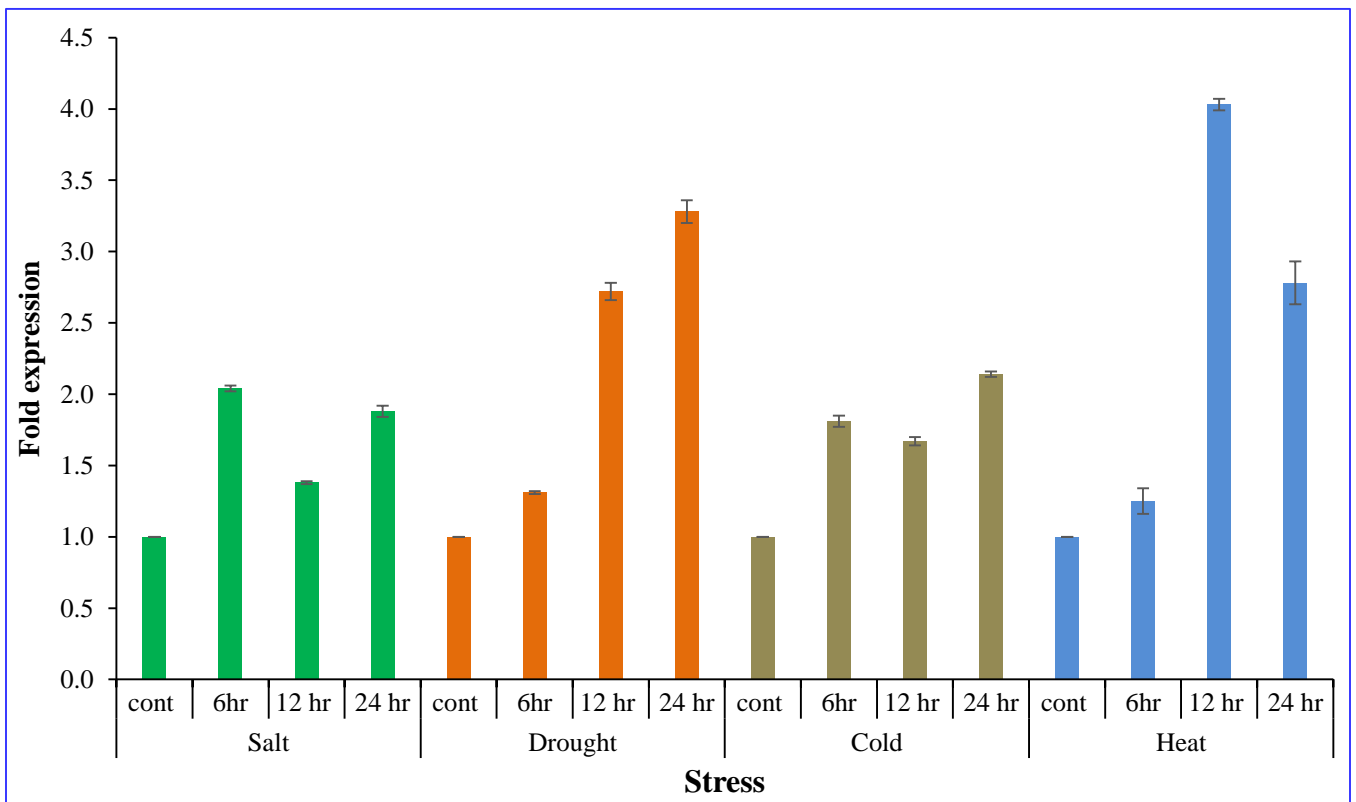

**Figure S3:** Transcription profiling of the *SbSDR1* gene under different abiotic stress condition.

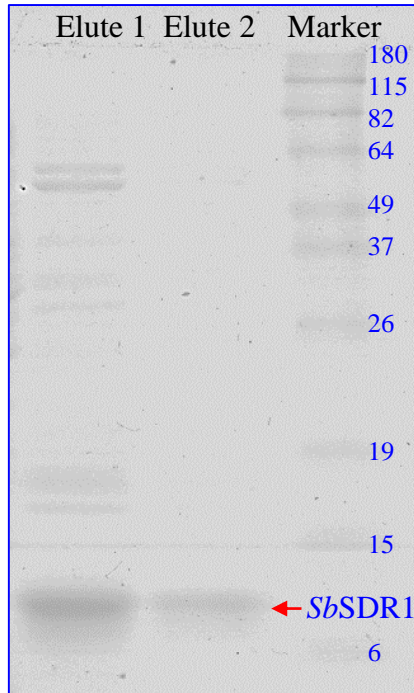

**Figure S4:** SDS-PAGE of the *SbSDR1* recombinant protein expressed in *E.coli*.

**A**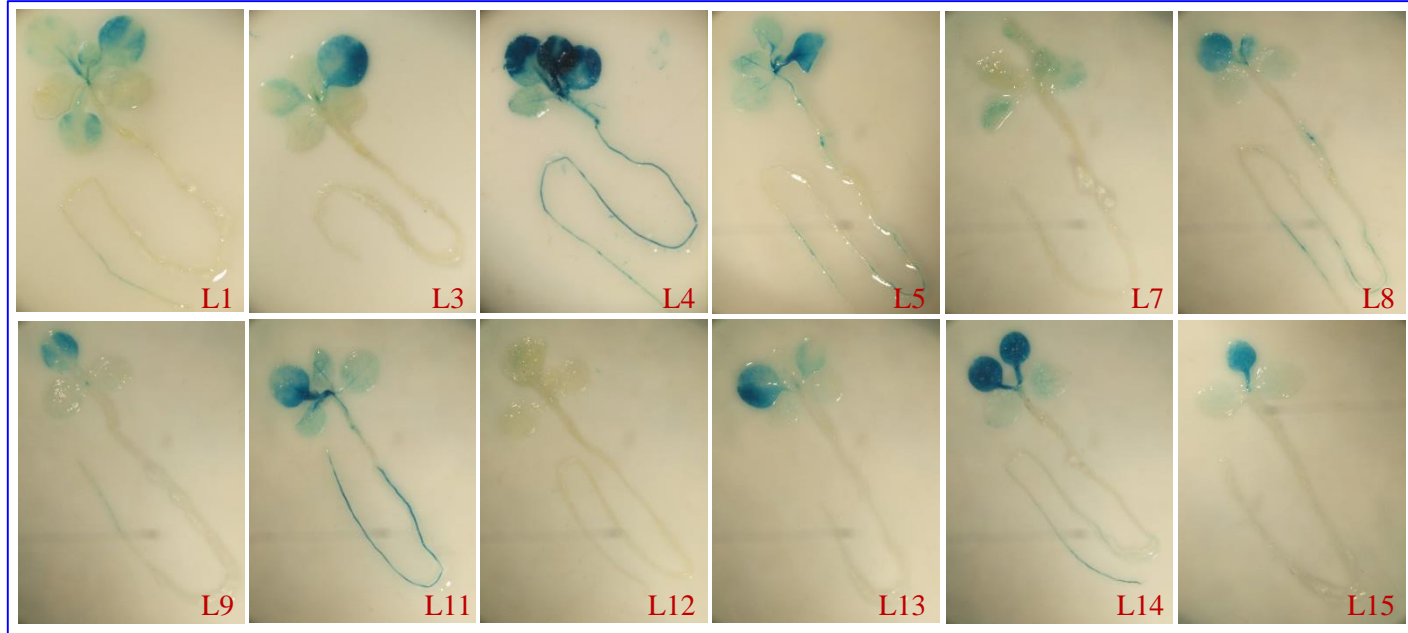**B**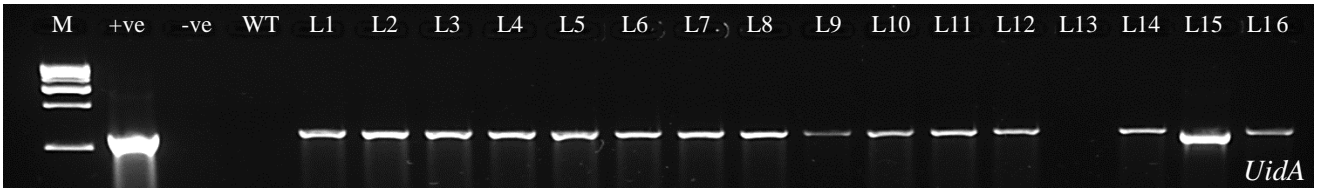**C**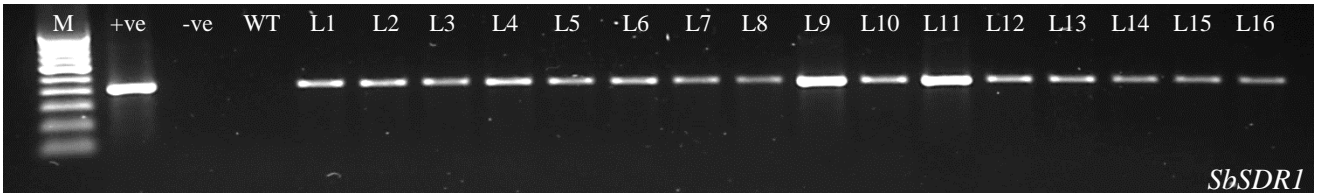

**Figure S5: Confirmation of putative transgenic lines.** (A) Histochemical GUS assay, amplification of (B) *UidA* gene and (C) *SbSDR1* gene in different transgenic lines. M: molecular marker, +ve: positive control, -ve: negative control, WT: wild type plant (non-transformed) and L1-L16: transgenic tobacco lines.

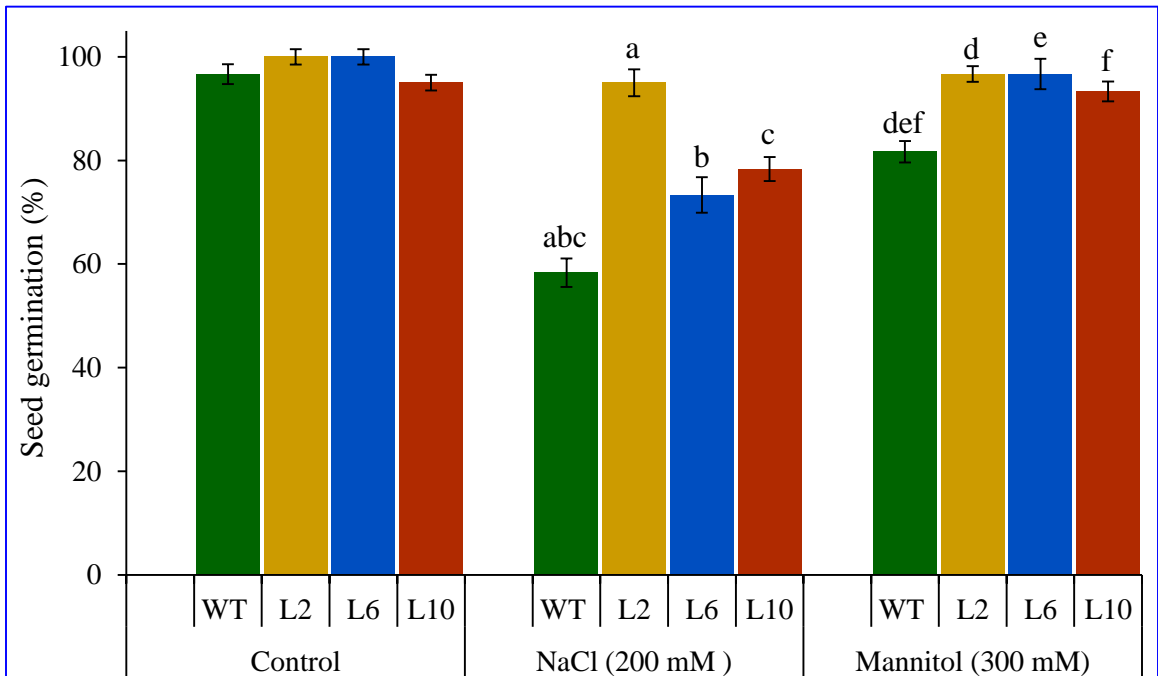

**Figure S6: Percent seed germination of transgenic tobacco plants under abiotic stress.** WT and transgenic lines (L2, L6 and L10) were germinated under salinity and osmotic stress condition. Bars represent means  $\pm$  SE and values with similar letters are significant at  $P < 0.05$ .

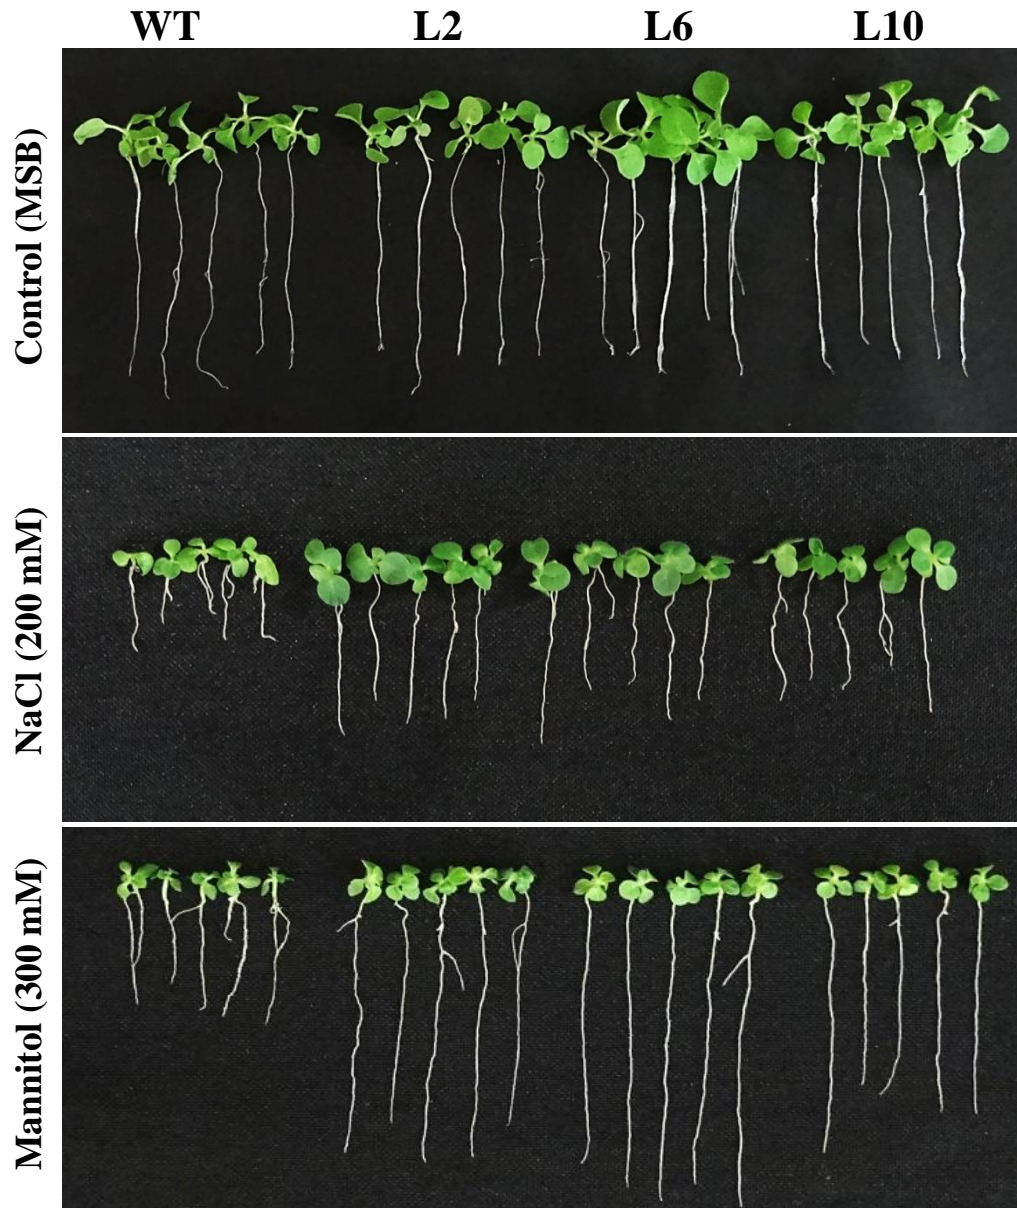

**Figure S7:** Comparative growth analysis of WT and transgenic lines under control and stress conditions.



### Yield parameters

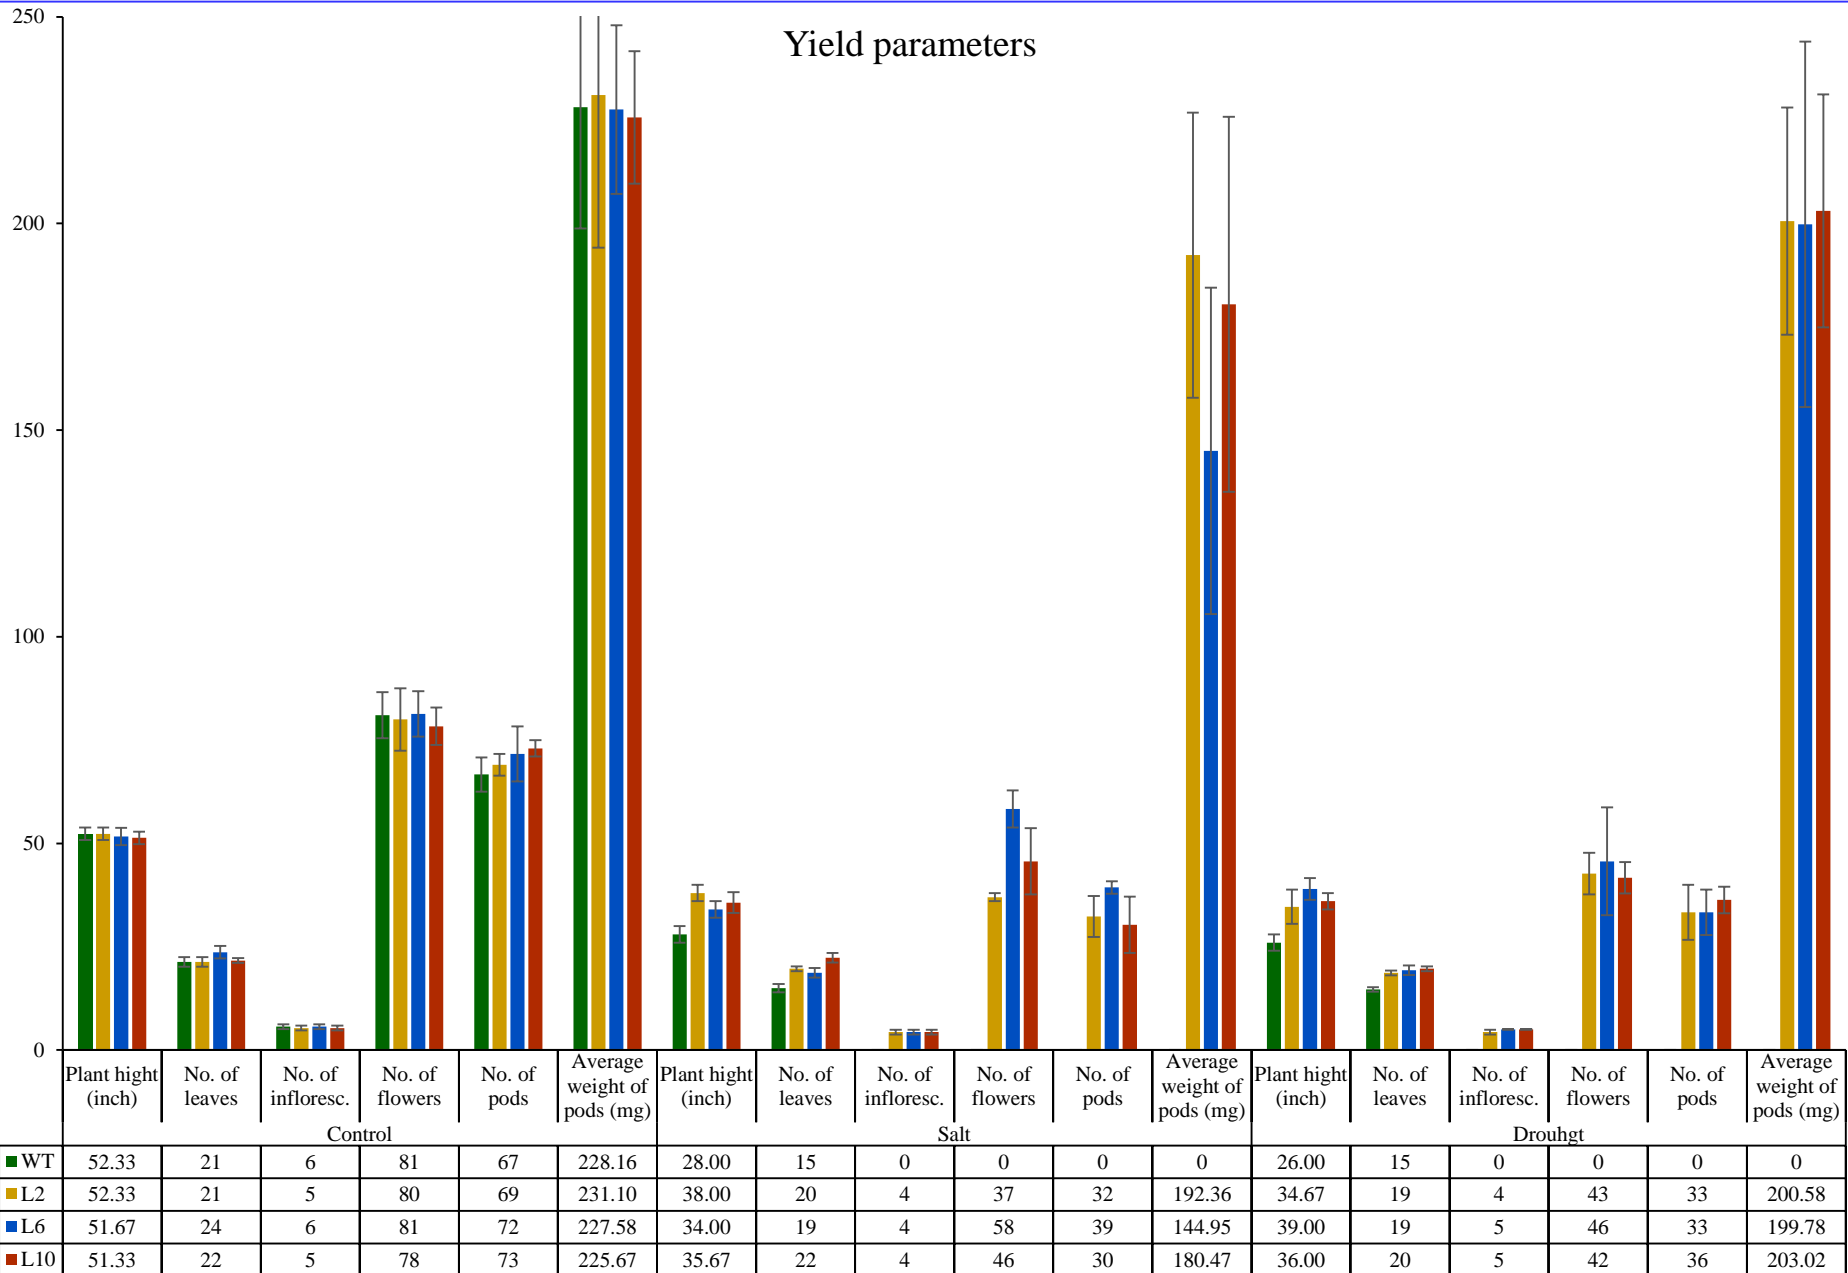

**Figure S8:** Yield parameters of WT and *SbSDRI* overexpressing transgenic lines under non-stress and stress conditions. All data were recorded as per stages of plants grown under control (non-stressed) condition.

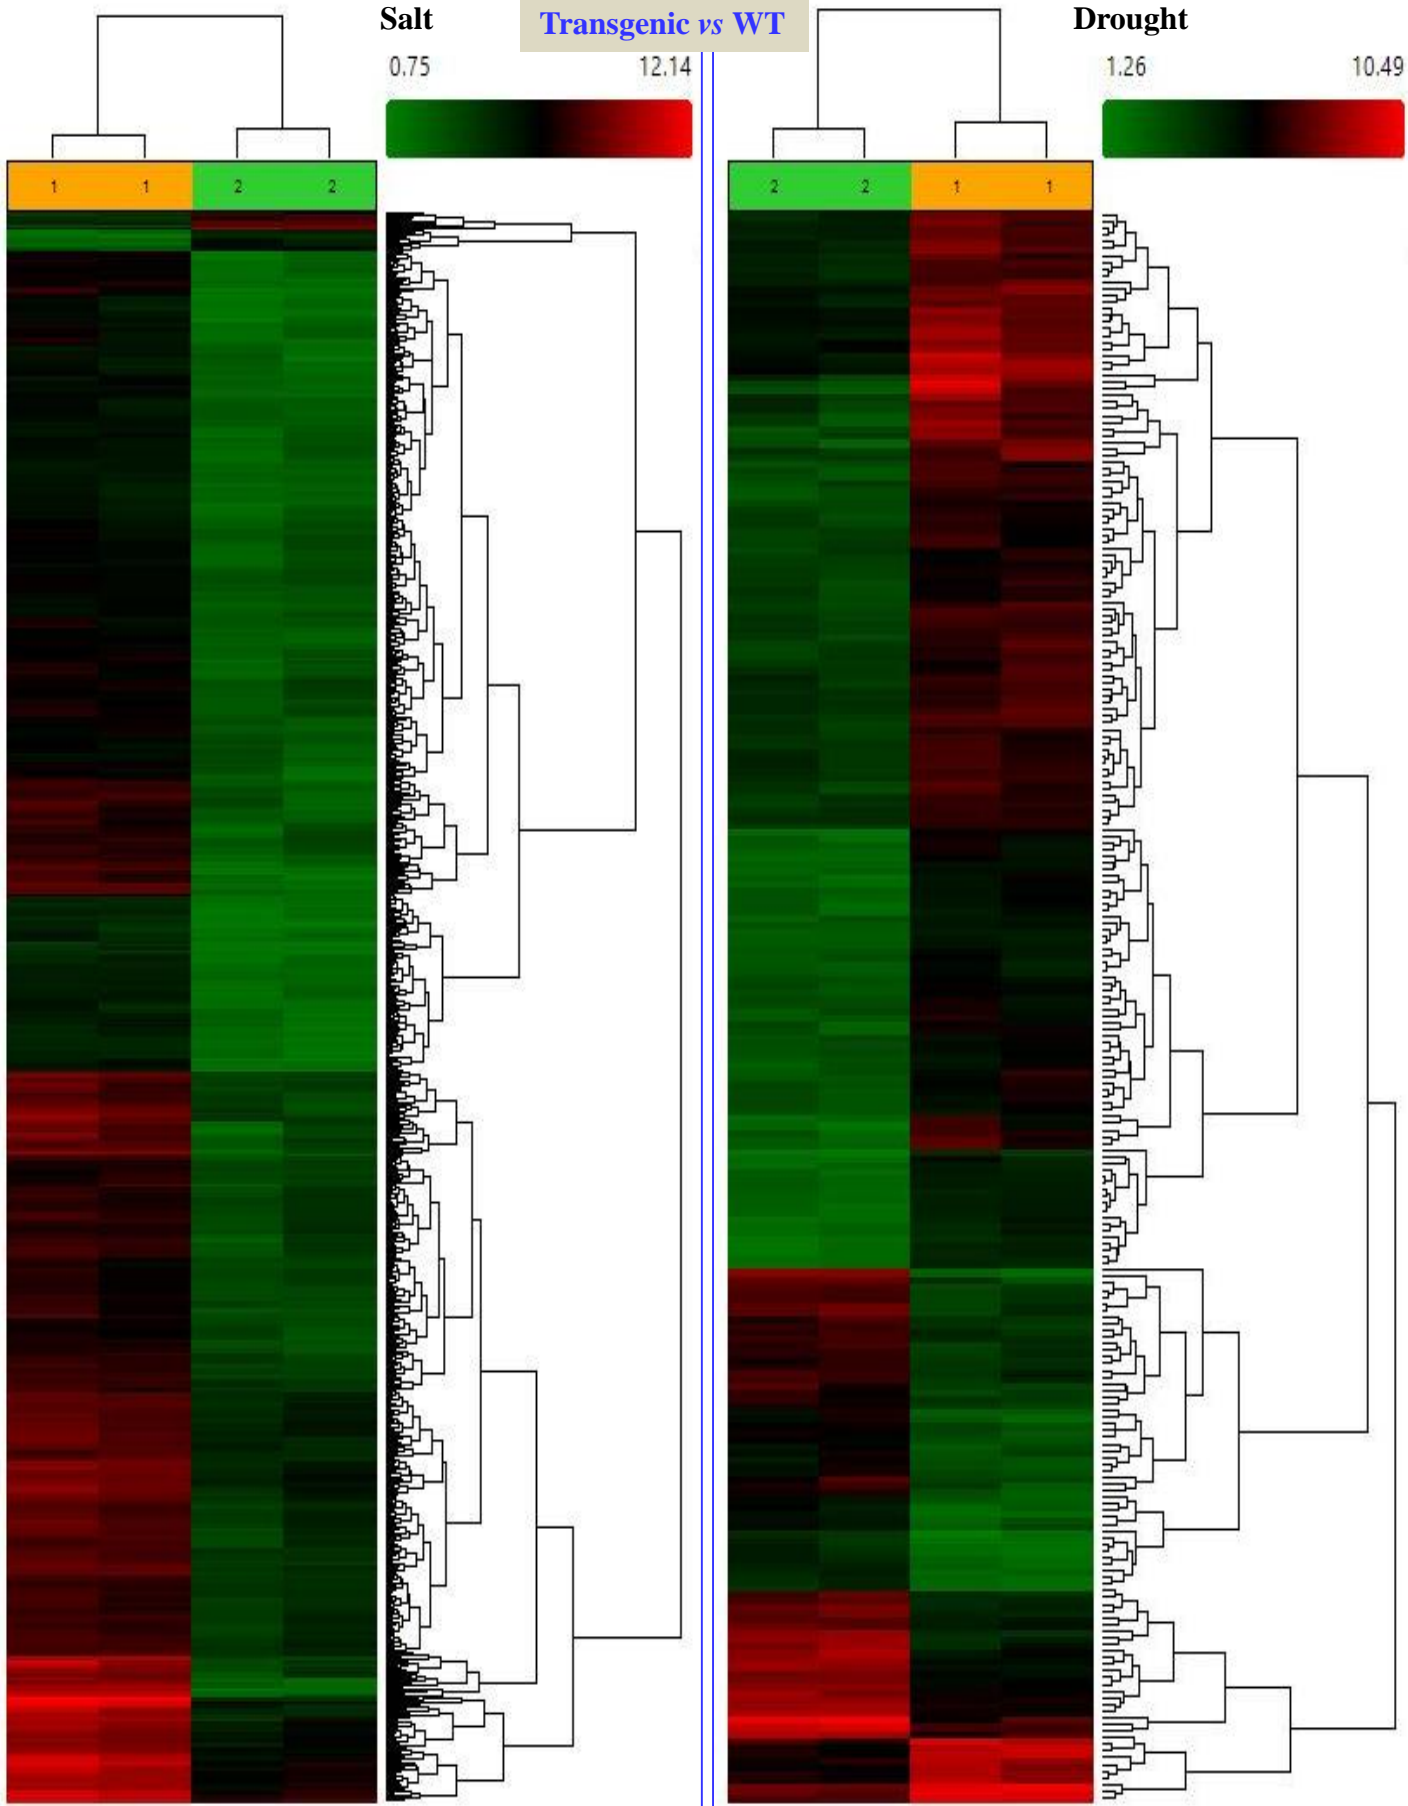

**Figure S9:** Hierarchical cluster analysis of *SbSDR1* transgenic tobacco plant showing differentially expressed genes under salt and osmotic (drought) stress conditions compared to WT plant.

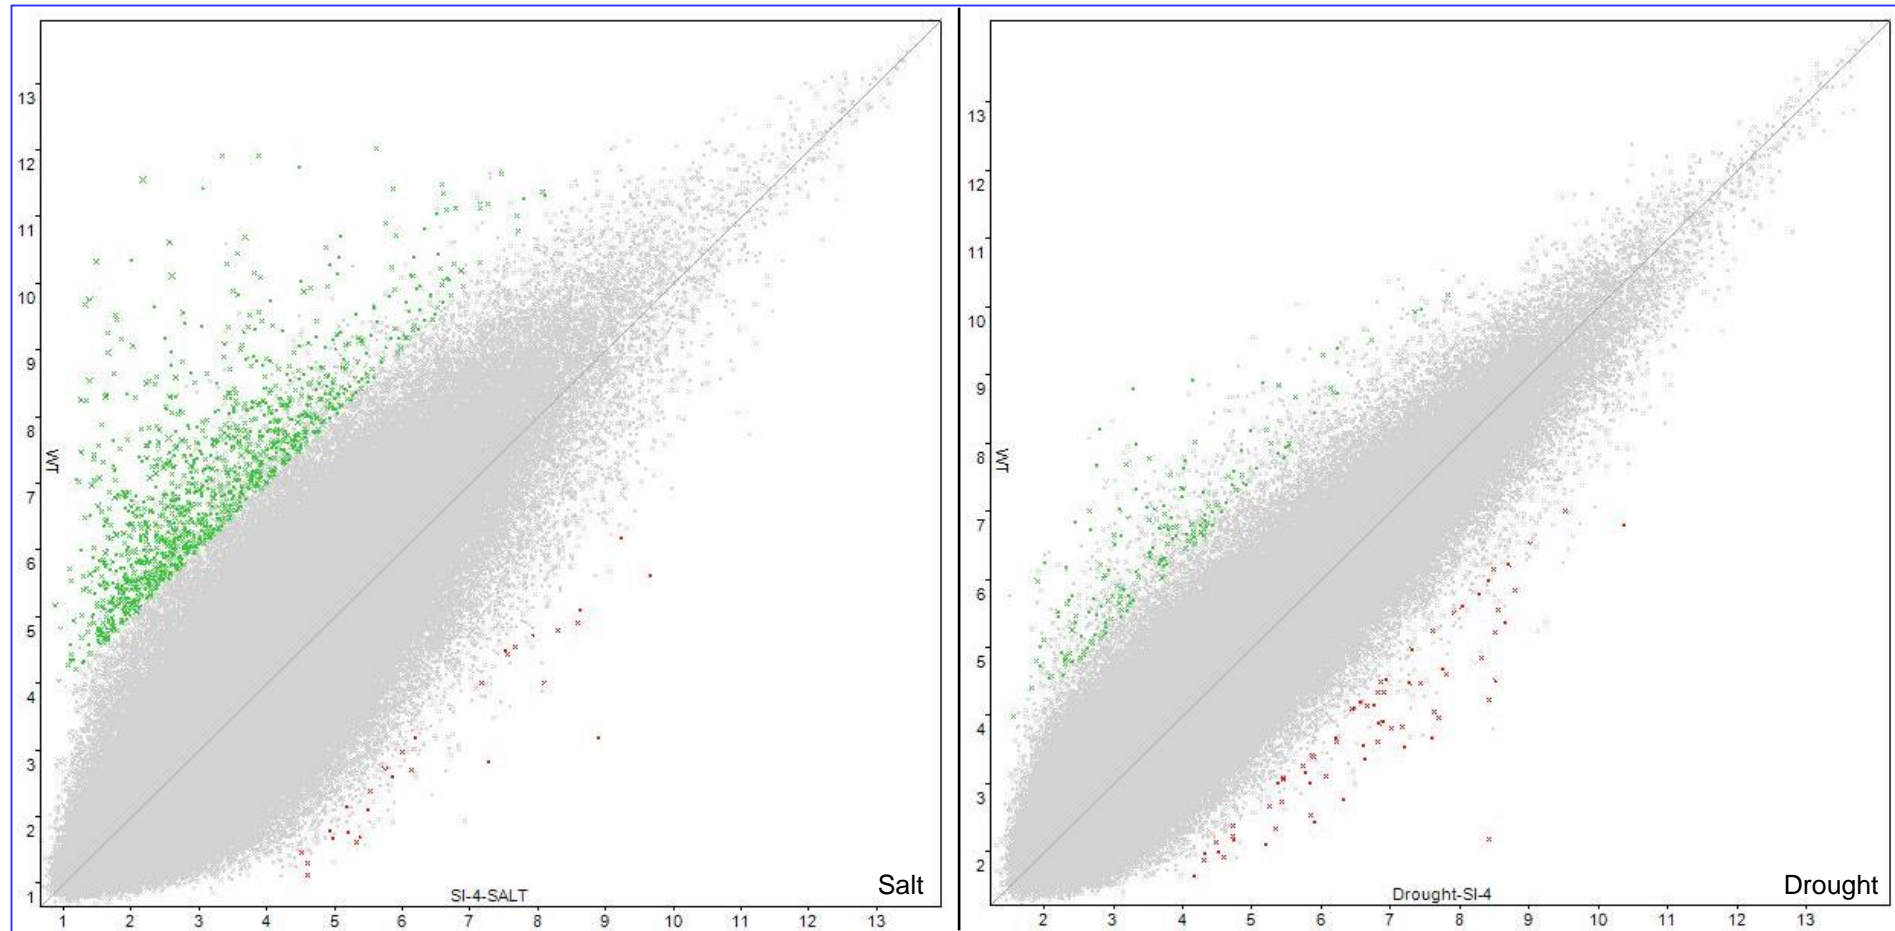

**Figure S10:** Scattered plot obtained from microarray analysis of *SbSDR1* transgenic tobacco plant showing differentially expressed genes under salt and osmotic (drought) stress conditions compared to WT plant.

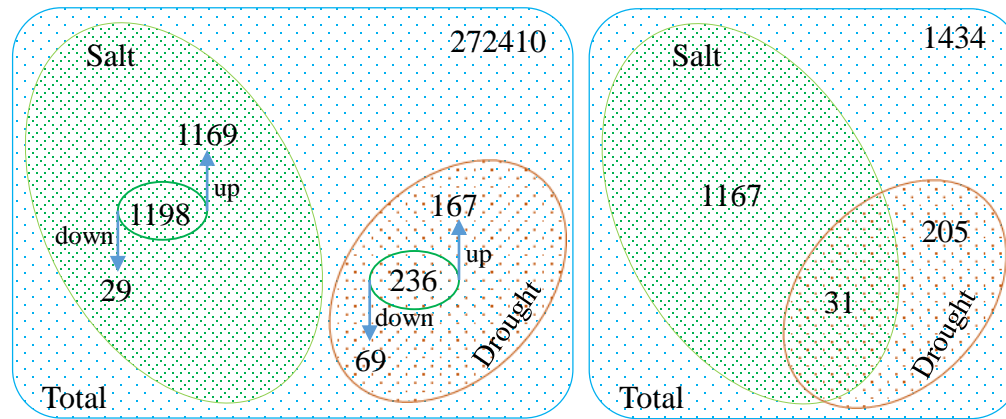

**Figure S11:** Venn diagram showing genes differentially expressed in *SbSDR1* transgenic plant compared to WT under salt and drought stress as studied by microarray.

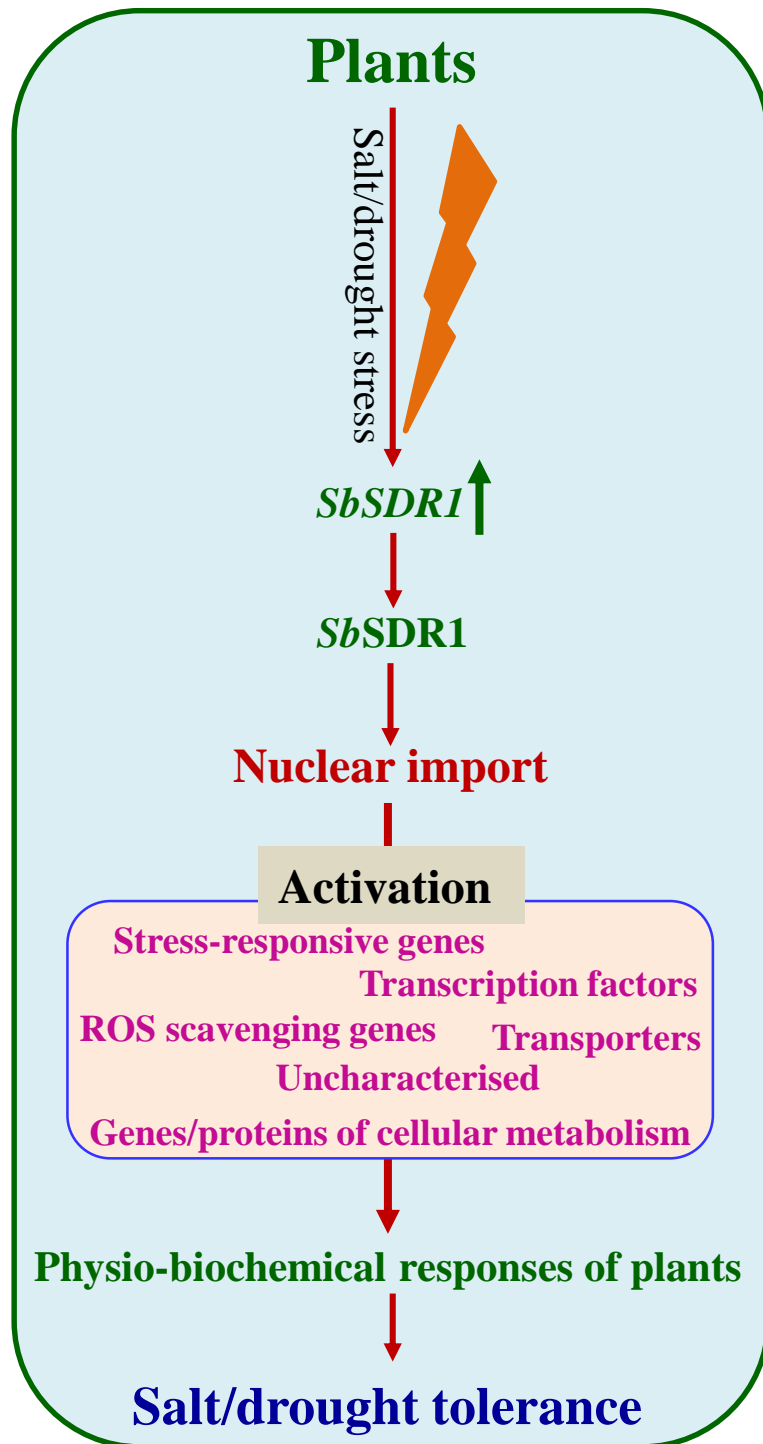

**Figure S12:** A hypothetical model explaining probable role of the *SbSDR1* in abiotic stress tolerance system.
